# Supplementary material for: Translating mRNAs strongly correlate to proteins in a multivariate manner and their translation ratios are phenotype specific
Source: PubMed Central journal article supplement — Nucleic Acids Res. 2013 Mar 20;41(9):4743–54. doi: 10.1093/nar/gkt178 (PMC3643591; doi:10.1093/nar/gkt178), 2013-03-20
Supplement: supp_gkt178_nar-00084-n-2013-File008.pdf [file supp_gkt178_nar-00084-n-2013-File008.pdf]

# Translating mRNAs strongly correlate to proteins in a multivariate manner and their translation ratios are phenotype-specific

Tong Wang \*, Yizhi Cui, Jingjie Jin, Jiahui Guo, Guibin Wang, Xingfeng Yin, Qing-Yu He \*, Gong Zhang \*

## SUPPLEMENTARY MATERIALS

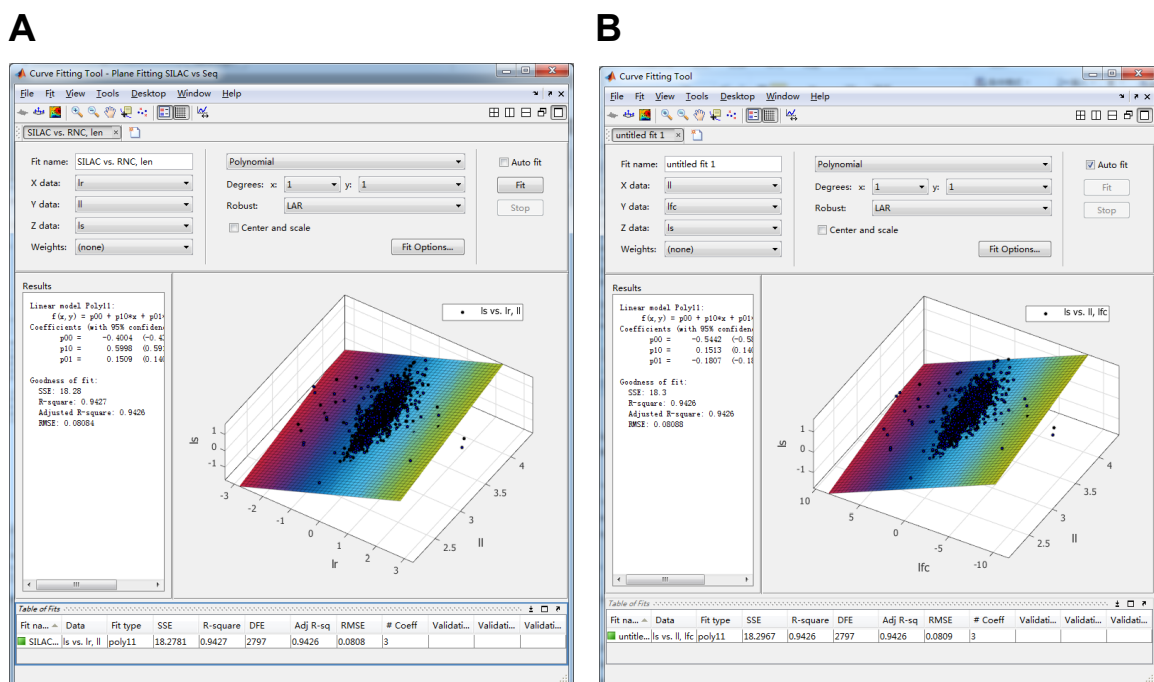

**Figure S1.** Raw screenshot of multivariate linear fitting of mRNA length, relative abundances of RNC-mRNAs and proteins, comparing A549 with HBE cells. The RNC-mRNA abundance ratio was calculated based on (A) rpkm method and (B) edgeR result. The fitting was performed using CurveFitting Toolbox in MATLAB R2012a.

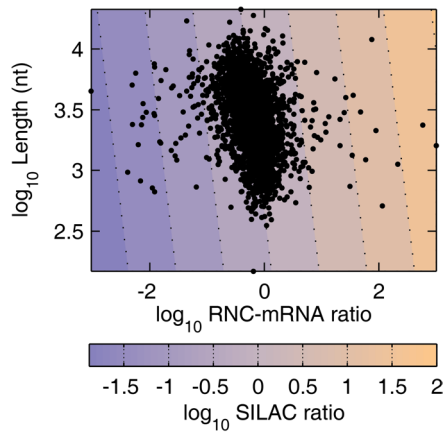

**Figure S2** Top view of **Fig. 3C**, showing that relative abundances of RNC-mRNAs are not correlated with mRNA lengths.

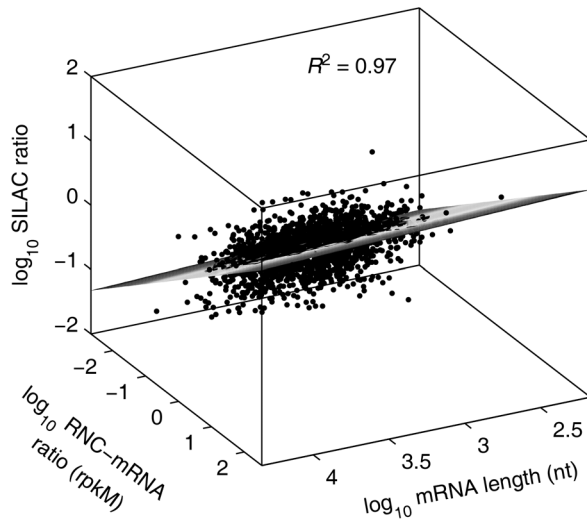

**Figure S3** Multivariate linear model fitting SILAC ratio (H1299/HBE), mRNA length and RNC-mRNA ratio (H1299/HBE), calculated based on rpkm normalization.

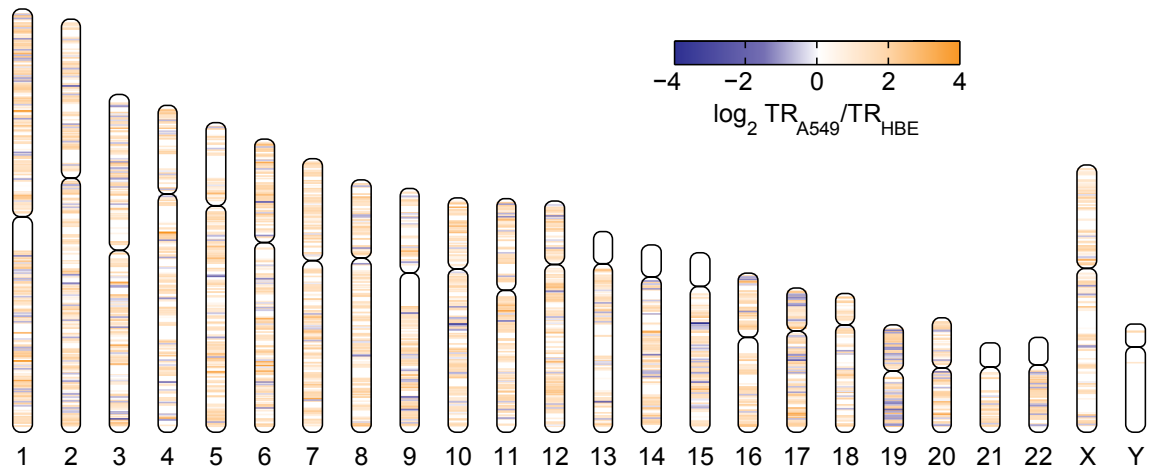

**Figure S4** Chromosomal locations of up-regulated (orange) and down-regulated (blue) genes in terms of TR ratios (A549/HBE). The color intensity represents the grade of TR regulation as indicated in the color scale.

**A**

| Top Networks |                                                                                                                  |       |
|--------------|------------------------------------------------------------------------------------------------------------------|-------|
| ID           | Associated Network Functions                                                                                     | Score |
| 1            | <a href="#">View</a> RNA Post-Transcriptional Modification, RNA Damage and Repair, Cell Morphology               | 45    |
| 2            | <a href="#">View</a> Cellular Assembly and Organization, Nucleic Acid Metabolism, Small Molecule Biochemistry    | 42    |
| 3            | <a href="#">View</a> Cell Cycle, Cell Morphology, Cellular Assembly and Organization                             | 37    |
| 4            | <a href="#">View</a> Connective Tissue Disorders, Dermatological Diseases and Conditions, Developmental Disorder | 37    |
| 5            | <a href="#">View</a> Carbohydrate Metabolism, Lipid Metabolism, Small Molecule Biochemistry                      | 37    |

  

| Top Bio Functions                               |                     |             |
|-------------------------------------------------|---------------------|-------------|
| Diseases and Disorders                          |                     |             |
| Name                                            | p-value             | # Molecules |
| <a href="#">Cancer</a>                          | 1.82E-12 - 5.13E-03 | 580         |
| <a href="#">Neurological Disease</a>            | 1.99E-12 - 2.15E-03 | 194         |
| <a href="#">Skeletal and Muscular Disorders</a> | 5.30E-11 - 2.15E-03 | 160         |
| <a href="#">Gastrointestinal Disease</a>        | 8.18E-09 - 4.43E-03 | 220         |
| <a href="#">Hematological Disease</a>           | 1.74E-08 - 4.92E-03 | 143         |

  

| Molecular and Cellular Functions                           |                     |             |
|------------------------------------------------------------|---------------------|-------------|
| Name                                                       | p-value             | # Molecules |
| <a href="#">Cell Death</a>                                 | 4.33E-13 - 4.52E-03 | 448         |
| <a href="#">DNA Replication, Recombination, and Repair</a> | 6.11E-13 - 3.15E-03 | 160         |
| <a href="#">Cellular Growth and Proliferation</a>          | 2.88E-11 - 5.04E-03 | 439         |
| <a href="#">Free Radical Scavenging</a>                    | 4.80E-10 - 2.15E-03 | 89          |
| <a href="#">Cellular Assembly and Organization</a>         | 1.44E-09 - 5.04E-03 | 289         |

  

| Top Canonical Pathways                                  |          |                |
|---------------------------------------------------------|----------|----------------|
| Name                                                    | p-value  | Ratio          |
| <a href="#">NRF2-mediated Oxidative Stress Response</a> | 3.53E-11 | 44/191 (0.23)  |
| <a href="#">Mitochondrial Dysfunction</a>               | 1.18E-10 | 36/174 (0.207) |
| <a href="#">Glycolysis/Gluconeogenesis</a>              | 1.71E-10 | 28/130 (0.215) |
| <a href="#">Butanoate Metabolism</a>                    | 6.39E-10 | 22/128 (0.172) |
| <a href="#">Integrin Signaling</a>                      | 4.39E-09 | 43/210 (0.205) |

**B**

| Top Networks |                                                                                                                                            |       |
|--------------|--------------------------------------------------------------------------------------------------------------------------------------------|-------|
| ID           | Associated Network Functions                                                                                                               | Score |
| 1            | <a href="#">View</a> Cellular Assembly and Organization, Cellular Function and Maintenance, Cardiovascular System Development and Function | 25    |
| 2            | <a href="#">View</a> Amino Acid Metabolism, Developmental Disorder, Hematological Disease                                                  | 25    |
| 3            | <a href="#">View</a> Endocrine System Development and Function, Small Molecule Biochemistry, Nervous System Development and Function       | 23    |
| 4            | <a href="#">View</a> Cellular Assembly and Organization, Cellular Compromise, Organ Morphology                                             | 22    |
| 5            | <a href="#">View</a> Cell Signaling, Nucleic Acid Metabolism, Small Molecule Biochemistry                                                  | 22    |

  

| Top Bio Functions                                      |                     |             |
|--------------------------------------------------------|---------------------|-------------|
| Diseases and Disorders                                 |                     |             |
| Name                                                   | p-value             | # Molecules |
| <a href="#">Immunological Disease</a>                  | 4.84E-07 - 5.52E-03 | 24          |
| <a href="#">Dermatological Diseases and Conditions</a> | 8.33E-07 - 5.52E-03 | 25          |
| <a href="#">Inflammatory Disease</a>                   | 8.33E-07 - 5.52E-03 | 30          |
| <a href="#">Cancer</a>                                 | 2.10E-06 - 5.52E-03 | 48          |
| <a href="#">Developmental Disorder</a>                 | 2.91E-06 - 5.52E-03 | 21          |

  

| Molecular and Cellular Functions        |                     |             |
|-----------------------------------------|---------------------|-------------|
| Name                                    | p-value             | # Molecules |
| <a href="#">Cell Death and Survival</a> | 2.48E-07 - 5.52E-03 | 41          |
| <a href="#">Cell Cycle</a>              | 3.88E-07 - 5.52E-03 | 23          |
| <a href="#">Cell Signaling</a>          | 4.08E-07 - 5.52E-03 | 19          |
| <a href="#">Molecular Transport</a>     | 4.08E-07 - 3.99E-03 | 17          |
| <a href="#">Nucleic Acid Metabolism</a> | 4.08E-07 - 2.97E-04 | 11          |

  

| Top Canonical Pathways                                                    |          |               |
|---------------------------------------------------------------------------|----------|---------------|
| Name                                                                      | p-value  | Ratio         |
| <a href="#">Role of Tissue Factor in Cancer</a>                           | 2.96E-04 | 5/114 (0.044) |
| <a href="#">Airway Pathology in Chronic Obstructive Pulmonary Disease</a> | 8.24E-04 | 2/9 (0.222)   |
| <a href="#">Hepatic Fibrosis / Hepatic Stellate Cell Activation</a>       | 1.02E-03 | 5/146 (0.034) |
| <a href="#">SAPK/JNK Signaling</a>                                        | 1.8E-03  | 4/102 (0.039) |
| <a href="#">IGF-1 Signaling</a>                                           | 1.94E-03 | 4/105 (0.038) |

**Figure S5.** General reports of Ingenuity pathway analysis (IPA) of (a) differentially expressed proteins (DEPs, fold change  $\geq 1.5$ ) and (b) genes with TR fold change  $\geq 4.0$ .

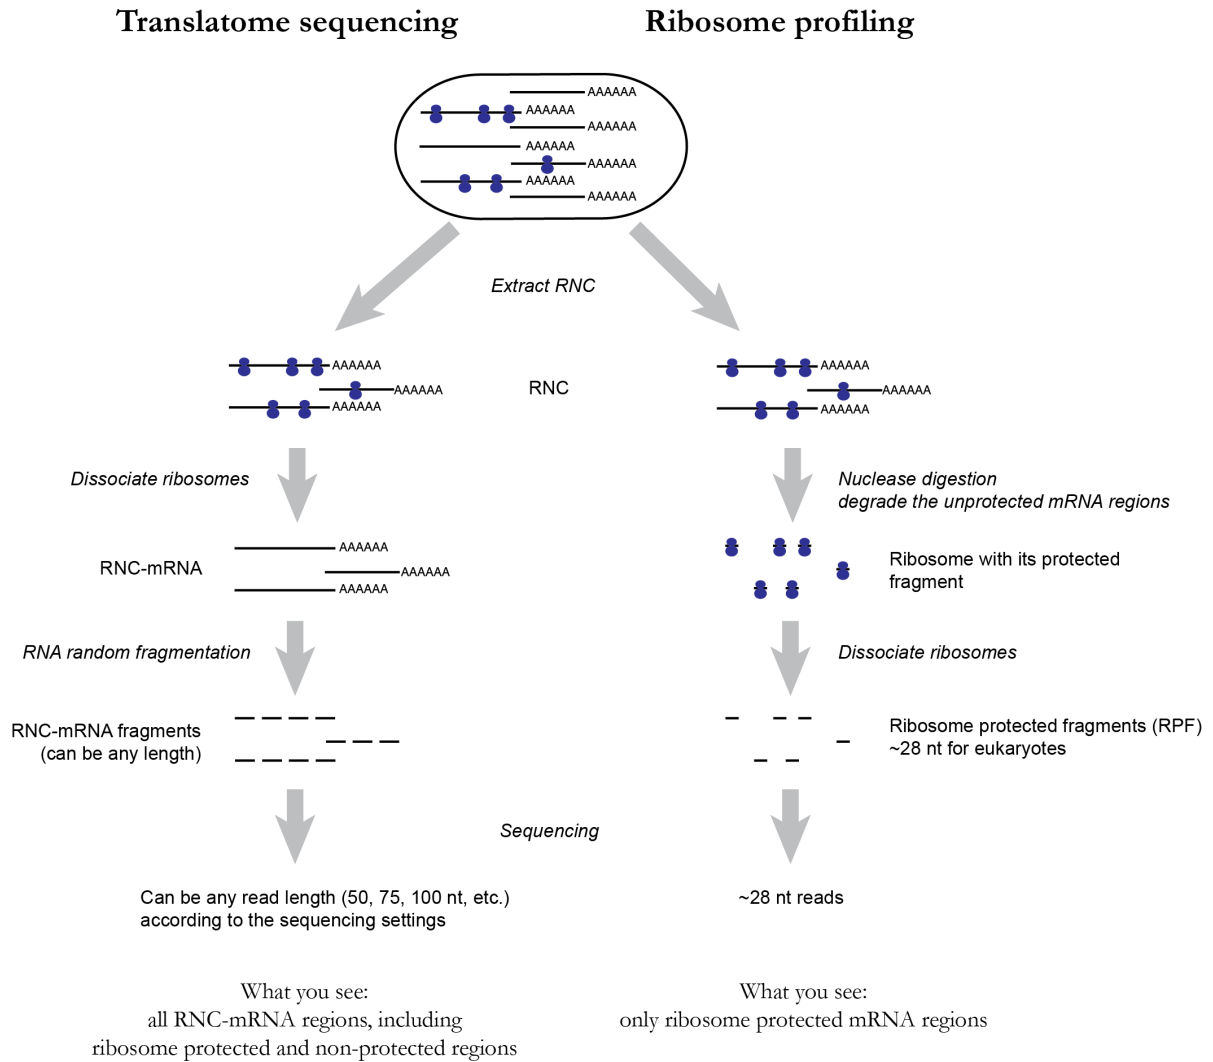

**Figure S6:** Comparison of translatome sequencing (applied in this study) and ribosome profiling. Both techniques require the extraction of RNC fraction. Next, ribosome profiling degrades unprotected mRNA regions using nuclease and then dissociates ribosomes, leaving the ribosome protected mRNA fragments (RPF), usually ~28nt for eukaryotes, for sequencing (1). In contrast, translatome profiling dissociates ribosomes from translating mRNAs immediately after RNC extraction. The entire translating mRNA molecules are then random fragmented and sequenced. These fragments contain both ribosome protected and unprotected regions. The fragments can be of any length, and the sequencing read lengths are totally dependent on the sequencing settings.

1. Ingolia, N.T., Ghaemmaghami, S., Newman, J.R. and Weissman, J.S. (2009) Genome-wide analysis in vivo of translation with nucleotide resolution using ribosome profiling. *Science*, **324**, 218-223.

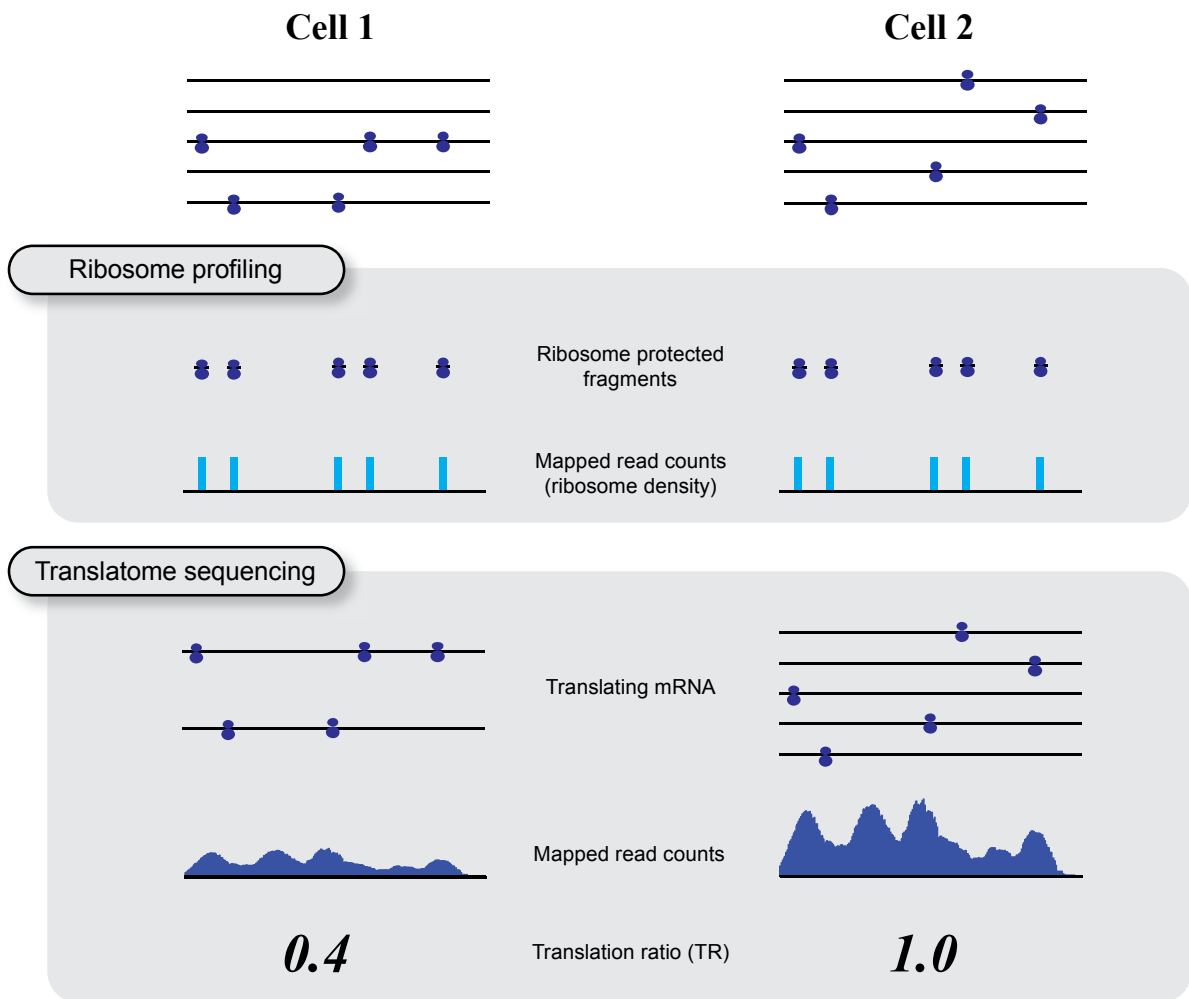

**Figure S7:** An example of differential outcomes comparing ribosome profiling and translatoem sequencing. Assume a gene X in two cells with obvious translation scenarios: in cell 1, only a small fraction of mRNA is subjected to translation and multiple ribosomes are attached to each translating mRNA molecule; in cell 2, almost all the mRNA is subjected to translation and only one ribosome is attached to each translating mRNA molecule. Using ribosome profiling, the ribosome protected fragments in the two cells may be identical, resulting in the same ribosome density. In contrast, translatoem sequencing is able to distinguish the difference of the amount of the translating mRNA molecules, thus can accurately determine the TR of this gene in the two cells. However, the sequencing reads from translatoem sequencing include both ribosome protected and unprotected regions, while ribosome profiling can accurately locate the positions of ribosomes.

**Table S1.** Number of sequenced and mapped reads with high quality of mRNA and RNC-mRNA of A549 and HBE cells.

| Sample                | Sequenced reads | Mapped reads |
|-----------------------|-----------------|--------------|
| <b>A549 mRNA</b>      | 19370847        | 15700378     |
| <b>A549 RNC-mRNA</b>  | 13538864        | 11851482     |
| <b>HBE mRNA</b>       | 12326472        | 9622423      |
| <b>HBE RNC-mRNA</b>   | 16782103        | 14437109     |
| <b>H1299 mRNA</b>     | 14800743        | 11248989     |
| <b>H1299 RNC-mRNA</b> | 14801206        | 12139690     |

**Table S2.** RT-PCR primers for validation of the six randomly selected genes.

| Gene           | Database accessions |                |                   | RT-PCR primers (5'-3') |                      | Abundance (rpKM) |          |         |          |
|----------------|---------------------|----------------|-------------------|------------------------|----------------------|------------------|----------|---------|----------|
|                | RNA RefSeq          | Protein RefSeq | UniProt accession | Forward primer         | Reverse primer       | A549             | A549     | HBE     | HBE      |
|                |                     |                |                   |                        |                      | mRNA             | RNC-mRNA | mRNA    | RNC-mRNA |
| <b>TGIF2</b>   | NM_001199513        | NP_068581      | Q9GZN2            | CTCCGCACAAAGTTTAC      | CTTCGTCTCACCTAG      | 2.92             | 4.488    | 27.887  | 28.351   |
| <b>BLCAP</b>   | NM_001167823        | NP_006689      | P62952            | GTGTAGAAAGAGCCCTGAC    | CCTGCCATCACGTCAG     | 9.975            | 16.705   | 108.438 | 101.268  |
| <b>DIDO1</b>   | NM_001193369        | NP_149072      | Q9BTC0            | CATTGTACGTACTACAG      | AACCTATGGACACTTGG    | 19.442           | 11.825   | 123.585 | 54.446   |
| <b>HMGB3P1</b> | NR_002165           | n/a            | n/a               | GAAGTGACCCAGGAAAC      | CACAAAGAAGGCAAAAGCAG | 23.468           | 65.714   | 48.852  | 290.81   |
| <b>ACSS2</b>   | NM_001242393        | NP_001229322   | n/a               | GGGCTAGATGGGGTC        | CCAGAATTCTGCACTCAC   | 6.511            | 8.263    | 39.924  | 34.794   |
| <b>FAM217B</b> | NM_001190826        | NP_071389      | n/a               | CAGTGCTCTGGCTATTG      | GGAAAGGTCTCCTACCAC   | 8.197            | 11.362   | 51.46   | 46.07    |

n/a = not available

**Table S3** List of gene identifications of RNA-seq of total mRNA and RNC-mRNA in A549 and HBE cells. The splice variants were merged.  
(Separate Excel file)

**Table S4** List of proteins identified by SILAC-based MS (A549/HBE).  
(Separate Excel file)

**Table S5** List of gene identifications of RNA-seq of total mRNA and RNC-mRNA in H1299 cells. The splice variants were merged.  
(Separate Excel file)

**Table S6** List of proteins identified by SILAC-based MS (H1299/HBE).  
(Separate Excel file)

**Table S7.** Genes with TR fold change  $\geq 4.0$  ( $\log_2$  scale 2.0), comparing A549 with HBE cells.

| Gene name        | log2 TR fold change | Function                                                                                         |
|------------------|---------------------|--------------------------------------------------------------------------------------------------|
| <i>C1orf74</i>   | 4.185               | Homo sapiens chromosome 1 open reading frame 74 (C1orf74), mRNA                                  |
| <i>IL8</i>       | 4.123               | Homo sapiens interleukin 8 (IL8), mRNA                                                           |
| <i>JUN</i>       | 4.059               | Homo sapiens jun proto-oncogene (JUN), mRNA                                                      |
| <i>GEM</i>       | 3.737               | Homo sapiens GTP binding protein overexpressed in skeletal muscle (GEM), mRNA                    |
| <i>SGK1</i>      | 3.596               | Homo sapiens serum/glucocorticoid regulated kinase 1 (SGK1), mRNA                                |
| <i>SNORD46</i>   | 3.449               | Homo sapiens adrenoceptor beta 2, surface (ADRB2), mRNA                                          |
| <i>PLCXD2</i>    | 3.359               | Homo sapiens phosphatidylinositol-specific phospholipase C, X domain containing 2 (PLCXD2), mRNA |
| <i>C14orf182</i> | 3.349               | Homo sapiens chromosome 14 open reading frame 182 (C14orf182), mRNA                              |
| <i>DUSP10</i>    | 3.292               | Homo sapiens dual specificity phosphatase 10 (DUSP10), mRNA                                      |
| <i>FOSL1</i>     | 3.282               | Homo sapiens FOS-like antigen 1 (FOSL1), mRNA                                                    |
| <i>MTRNR2L6</i>  | 3.276               | Homo sapiens MT-RNR2-like 6 (MTRNR2L6), mRNA                                                     |
| <i>EDN1</i>      | 3.193               | Homo sapiens endothelin 1 (EDN1), mRNA                                                           |
| <i>C17orf110</i> | 3.165               | Homo sapiens chromosome 17 open reading frame 110 (C17orf110), mRNA                              |
| <i>MTRNR2L3</i>  | 3.111               | Homo sapiens MT-RNR2-like 3 (MTRNR2L3), mRNA                                                     |
| <i>PRDM1</i>     | 3.074               | Homo sapiens PR domain containing 1, with ZNF domain (PRDM1), mRNA                               |
| <i>MTRNR2L10</i> | 3.036               | Homo sapiens MT-RNR2-like 10 (MTRNR2L10), mRNA                                                   |
| <i>CSRNP1</i>    | 3.013               | Homo sapiens cysteine-serine-rich nuclear protein 1 (CSRNP1), mRNA                               |
| <i>ANKRD37</i>   | 3.001               | Homo sapiens ankyrin repeat domain 37 (ANKRD37), mRNA                                            |
| <i>MTRNR2L1</i>  | 2.998               | Homo sapiens MT-RNR2-like 1 (MTRNR2L1), mRNA                                                     |
| <i>TNFAIP3</i>   | 2.983               | Homo sapiens tumor necrosis factor, alpha-induced protein 3 (TNFAIP3), mRNA                      |
| <i>CTGF</i>      | 2.976               | Homo sapiens connective tissue growth factor (CTGF), mRNA                                        |
| <i>TM4SF1</i>    | 2.968               | Homo sapiens transmembrane 4 L six family member 1 (TM4SF1), mRNA                                |



|                 |       |                                                                                                  |
|-----------------|-------|--------------------------------------------------------------------------------------------------|
| <b>SPHK1</b>    | 2.875 | Homo sapiens sphingosine kinase 1 (SPHK1), mRNA                                                  |
| <b>GRHL3</b>    | 2.839 | Homo sapiens grainyhead-like 3 (Drosophila) (GRHL3), mRNA                                        |
| <b>KLF6</b>     | 2.818 | Homo sapiens Kruppel-like factor 6 (KLF6), mRNA                                                  |
| <b>BCL2A1</b>   | 2.815 | Homo sapiens BCL2-related protein A1 (BCL2A1), mRNA                                              |
| <b>EMBP1</b>    | 2.810 | Homo sapiens suppressor of cytokine signaling 3 (SOCS3), mRNA                                    |
| <b>SRR</b>      | 2.807 | Homo sapiens serine racemase (SRR), mRNA                                                         |
| <b>MTRNR2L4</b> | 2.767 | Homo sapiens MT-RNR2-like 4 (MTRNR2L4), mRNA                                                     |
| <b>C1orf56</b>  | 2.660 | Homo sapiens chromosome 1 open reading frame 56 (C1orf56), mRNA                                  |
| <b>SOX9</b>     | 2.655 | Homo sapiens SRY (sex determining region Y)-box 9 (SOX9), mRNA                                   |
| <b>PPM1L</b>    | 2.651 | Homo sapiens protein phosphatase, Mg <sup>2+</sup> /Mn <sup>2+</sup> dependent, 1L (PPM1L), mRNA |
| <b>TPM2</b>     | 2.626 | Homo sapiens tropomyosin 2 (beta) (TPM2), mRNA                                                   |
| <b>KLF4</b>     | 2.619 | Homo sapiens Kruppel-like factor 4 (gut) (KLF4), mRNA                                            |
| <b>C6orf226</b> | 2.610 | Homo sapiens chromosome 6 open reading frame 226 (C6orf226), mRNA                                |
| <b>UFSP1</b>    | 2.610 | Homo sapiens UFM1-specific peptidase 1 (non-functional) (UFSP1), mRNA                            |
| <b>PTGER4</b>   | 2.599 | Homo sapiens prostaglandin E receptor 4 (subtype EP4) (PTGER4), mRNA                             |
| <b>SATB1</b>    | 2.593 | Homo sapiens SATB homeobox 1 (SATB1), mRNA                                                       |
| <b>CXCL3</b>    | 2.593 | Homo sapiens chemokine (C-X-C motif) ligand 3 (CXCL3), mRNA                                      |
| <b>BCORP1</b>   | 2.579 | Homo sapiens regulator of G-protein signaling 2, 24kDa (RGS2), mRNA                              |
| <b>PPP1R15A</b> | 2.576 | Homo sapiens protein phosphatase 1, regulatory subunit 15A (PPP1R15A), mRNA                      |
| <b>TMCC3</b>    | 2.575 | Homo sapiens transmembrane and coiled-coil domain family 3 (TMCC3), mRNA                         |
| <b>CXCL2</b>    | 2.570 | Homo sapiens chemokine (C-X-C motif) ligand 2 (CXCL2), mRNA                                      |
| <b>PMAIP1</b>   | 2.562 | Homo sapiens phorbol-12-myristate-13-acetate-induced protein 1 (PMAIP1), mRNA                    |
| <b>MTRNR2L8</b> | 2.558 | Homo sapiens MT-RNR2-like 8 (MTRNR2L8), mRNA                                                     |
| <b>FAM43A</b>   | 2.557 | Homo sapiens family with sequence similarity 43, member A (FAM43A), mRNA                         |
| <b>KRT16</b>    | 2.539 | Homo sapiens keratin 16 (KRT16), mRNA                                                            |
| <b>FOXQ1</b>    | 2.502 | Homo sapiens forkhead box Q1 (FOXQ1), mRNA                                                       |
| <b>ATAD3C</b>   | 2.479 | Homo sapiens ATPase family, AAA domain containing 3C (ATAD3C), mRNA                              |
| <b>HBEGF</b>    | 2.475 | Homo sapiens heparin-binding EGF-like growth factor (HBEGF), mRNA                                |
| <b>CLYBL</b>    | 2.470 | Homo sapiens citrate lyase beta like (CLYBL), mRNA                                               |
| <b>GNG11</b>    | 2.457 | Homo sapiens guanine nucleotide binding protein (G protein), gamma 11 (GNG11), mRNA              |
| <b>GSTM2</b>    | 2.444 | Homo sapiens glutathione S-transferase mu 2 (muscle) (GSTM2), mRNA                               |
| <b>CTU1</b>     | 2.436 | Homo sapiens cytosolic thiouridylase subunit 1 homolog (S. pombe) (CTU1), mRNA                   |
| <b>MTRNR2L2</b> | 2.435 | Homo sapiens MT-RNR2-like 2 (MTRNR2L2), mRNA                                                     |
| <b>SRRM5</b>    | 2.430 | Homo sapiens serine/arginine repetitive matrix 5 (SRRM5), mRNA                                   |
| <b>POLL</b>     | 2.428 | Homo sapiens polymerase (DNA directed), lambda (POLL), mRNA                                      |
| <b>FAM224B</b>  | 2.412 | Homo sapiens tenascin C (TNC), mRNA                                                              |
| <b>HSPA1L</b>   | 2.406 | Homo sapiens heat shock 70kDa protein 1-like (HSPA1L), mRNA                                      |
| <b>FAM27A</b>   | 2.389 | Homo sapiens AHNAK nucleoprotein (AHNAK), mRNA                                                   |
| <b>KCNH3</b>    | 2.381 | Homo sapiens potassium voltage-gated channel, subfamily H (eag-related), member 3                |

|                  |       |                                                                                                   |
|------------------|-------|---------------------------------------------------------------------------------------------------|
|                  |       | (KCNH3), mRNA                                                                                     |
| <b>CSPG4P1Y</b>  | 2.381 | Homo sapiens cysteine-rich, angiogenic inducer, 61 (CYR61), mRNA                                  |
| <b>PTGIS</b>     | 2.374 | Homo sapiens prostaglandin I2 (prostacyclin) synthase (PTGIS), mRNA                               |
| <b>ADAT3</b>     | 2.361 | Homo sapiens adenosine deaminase, tRNA-specific 3 (ADAT3), mRNA                                   |
| <b>CDNF</b>      | 2.356 | Homo sapiens cerebral dopamine neurotrophic factor (CDNF), mRNA                                   |
| <b>PKD2L2</b>    | 2.347 | Homo sapiens polycystic kidney disease 2-like 2 (PKD2L2), mRNA                                    |
| <b>ARL5B</b>     | 2.323 | Homo sapiens ADP-ribosylation factor-like 5B (ARL5B), mRNA                                        |
| <b>MIR298</b>    | 2.321 | Homo sapiens zinc finger protein 34 (ZNF34), mRNA                                                 |
| <b>TPPP</b>      | 2.301 | Homo sapiens tubulin polymerization promoting protein (TPPP), mRNA                                |
| <b>RPL31P11</b>  | 2.290 | Homo sapiens cyclin-dependent kinase 17 (CDK17), mRNA                                             |
| <b>C14orf132</b> | 2.285 | Homo sapiens chromosome 14 open reading frame 132 (C14orf132), mRNA                               |
| <b>IL17D</b>     | 2.270 | Homo sapiens interleukin 17D (IL17D), mRNA                                                        |
| <b>STAG3</b>     | 2.269 | Homo sapiens stromal antigen 3 (STAG3), mRNA                                                      |
| <b>FAM131B</b>   | 2.238 | Homo sapiens family with sequence similarity 131, member B (FAM131B), mRNA                        |
| <b>FOXD1</b>     | 2.227 | Homo sapiens forkhead box D1 (FOXD1), mRNA                                                        |
| <b>MC1R</b>      | 2.223 | Homo sapiens melanocortin 1 receptor (alpha melanocyte stimulating hormone receptor) (MC1R), mRNA |
| <b>TM4SF19</b>   | 2.214 | Homo sapiens transmembrane 4 L six family member 19 (TM4SF19), mRNA                               |
| <b>ARHGAP30</b>  | 2.206 | Homo sapiens Rho GTPase activating protein 30 (ARHGAP30), mRNA                                    |
| <b>SH2B2</b>     | 2.188 | Homo sapiens SH2B adaptor protein 2 (SH2B2), mRNA                                                 |
| <b>MYL5</b>      | 2.180 | Homo sapiens myosin, light chain 5, regulatory (MYL5), mRNA                                       |
| <b>RPS6KA6</b>   | 2.170 | Homo sapiens ribosomal protein S6 kinase, 90kDa, polypeptide 6 (RPS6KA6), mRNA                    |
| <b>RTL1</b>      | 2.169 | Homo sapiens retrotransposon-like 1 (RTL1), mRNA                                                  |
| <b>ZNF789</b>    | 2.161 | Homo sapiens zinc finger protein 789 (ZNF789), mRNA                                               |
| <b>C15orf41</b>  | 2.161 | Homo sapiens chromosome 15 open reading frame 41 (C15orf41), mRNA                                 |
| <b>NIPAL1</b>    | 2.156 | Homo sapiens NIPA-like domain containing 1 (NIPAL1), mRNA                                         |
| <b>WDR63</b>     | 2.144 | Homo sapiens WD repeat domain 63 (WDR63), mRNA                                                    |
| <b>ZNF331</b>    | 2.144 | Homo sapiens zinc finger protein 331 (ZNF331), mRNA                                               |
| <b>POLR2J3</b>   | 2.138 | Homo sapiens polymerase (RNA) II (DNA directed) polypeptide J3 (POLR2J3), mRNA                    |
| <b>LYPD6</b>     | 2.138 | Homo sapiens LY6/PLAUR domain containing 6 (LYPD6), mRNA                                          |
| <b>MYO5B</b>     | 2.132 | Homo sapiens myosin VB (MYO5B), mRNA                                                              |
| <b>ZNF593</b>    | 2.125 | Homo sapiens zinc finger protein 593 (ZNF593), mRNA                                               |
| <b>YOD1</b>      | 2.124 | Homo sapiens YOD1 OTU deubiquinating enzyme 1 homolog (S. cerevisiae) (YOD1), mRNA                |
| <b>MIR379</b>    | 2.123 | Homo sapiens kelch repeat and BTB (POZ) domain containing 8 (KBTBD8), mRNA                        |
| <b>FAM101B</b>   | 2.116 | Homo sapiens family with sequence similarity 101, member B (FAM101B), mRNA                        |
| <b>CLDN23</b>    | 2.110 | Homo sapiens claudin 23 (CLDN23), mRNA                                                            |
| <b>E2F7</b>      | 2.110 | Homo sapiens E2F transcription factor 7 (E2F7), mRNA                                              |
| <b>CCDC96</b>    | 2.110 | Homo sapiens coiled-coil domain containing 96 (CCDC96), mRNA                                      |
| <b>IQCD</b>      | 2.099 | Homo sapiens IQ motif containing D (IQCD), mRNA                                                   |

|                  |        |                                                                                                          |
|------------------|--------|----------------------------------------------------------------------------------------------------------|
| <b>TSC22D1</b>   | 2.098  | Homo sapiens TSC22 domain family, member 1 (TSC22D1), mRNA                                               |
| <b>ZBTB43</b>    | 2.098  | Homo sapiens zinc finger and BTB domain containing 43 (ZBTB43), mRNA                                     |
| <b>CCDC71L</b>   | 2.088  | Homo sapiens coiled-coil domain containing 71-like (CCDC71L), mRNA                                       |
| <b>SLC52A1</b>   | 2.087  | Homo sapiens solute carrier family 52, riboflavin transporter, member 1 (SLC52A1), mRNA                  |
| <b>RAPGEF3</b>   | 2.075  | Homo sapiens Rap guanine nucleotide exchange factor (GEF) 3 (RAPGEF3), mRNA                              |
| <b>HIST2H2AC</b> | 2.068  | Homo sapiens histone cluster 2, H2ac (HIST2H2AC), mRNA                                                   |
| <b>GADD45A</b>   | 2.051  | Homo sapiens growth arrest and DNA-damage-inducible, alpha (GADD45A), mRNA                               |
| <b>MED26</b>     | 2.051  | Homo sapiens mediator complex subunit 26 (MED26), mRNA                                                   |
| <b>DENND2D</b>   | 2.050  | Homo sapiens DENN/MADD domain containing 2D (DENND2D), mRNA                                              |
| <b>NAPRT1</b>    | 2.050  | Homo sapiens nicotinate phosphoribosyltransferase domain containing 1 (NAPRT1), mRNA                     |
| <b>HS3ST1</b>    | 2.046  | Homo sapiens heparan sulfate (glucosamine) 3-O-sulfotransferase 1 (HS3ST1), mRNA                         |
| <b>PLEKHF1</b>   | 2.046  | Homo sapiens pleckstrin homology domain containing, family F (with FYVE domain) member 1 (PLEKHF1), mRNA |
| <b>ZNF771</b>    | 2.045  | Homo sapiens zinc finger protein 771 (ZNF771), mRNA                                                      |
| <b>PRDM7</b>     | 2.036  | Homo sapiens PR domain containing 7 (PRDM7), mRNA                                                        |
| <b>ADM</b>       | 2.032  | Homo sapiens adrenomedullin (ADM), mRNA                                                                  |
| <b>FBXO6</b>     | 2.026  | Homo sapiens F-box protein 6 (FBXO6), mRNA                                                               |
| <b>KRT17</b>     | 2.024  | Homo sapiens keratin 17 (KRT17), mRNA                                                                    |
| <b>BMP7</b>      | 2.016  | Homo sapiens bone morphogenetic protein 7 (BMP7), mRNA                                                   |
| <b>XBP1</b>      | 2.016  | Homo sapiens X-box binding protein 1 (XBP1), mRNA                                                        |
| <b>TMEM116</b>   | 2.014  | Homo sapiens transmembrane protein 116 (TMEM116), mRNA                                                   |
| <b>XAGE1C</b>    | 2.002  | Homo sapiens ribosomal protein L13 (RPL13), mRNA                                                         |
| <b>CBWD6</b>     | 2.002  | Homo sapiens COBW domain containing 6 (CBWD6), mRNA                                                      |
| <b>ZNF846</b>    | 2.001  | Homo sapiens zinc finger protein 846 (ZNF846), mRNA                                                      |
| <b>DDIT4</b>     | -2.652 | Homo sapiens DNA-damage-inducible transcript 4 (DDIT4), mRNA                                             |
| <b>BMF</b>       | -4.034 | Homo sapiens Bcl2 modifying factor (BMF), mRNA                                                           |
